# Supplementary material for: Nilotinib impairs skeletal myogenesis by increasing myoblast proliferation
Source: PubMed Central journal article supplement (PMC5819301; doi:10.1186/s13395-018-0150-5), 2018-02-20
Supplement: 13395_2018_150_MOESM7_ESM.pdf [file 13395_2018_150_MOESM7_ESM.pdf]

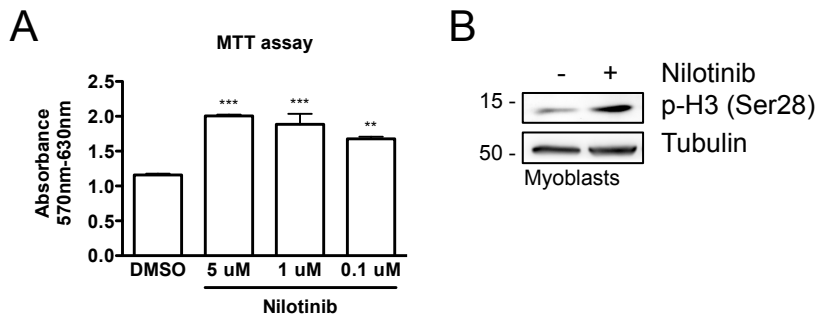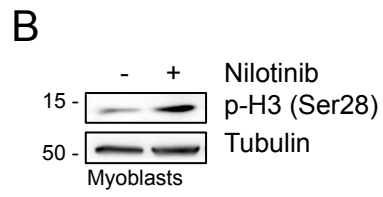

Fig S5.
